# Supplementary material for: Understanding the heterogeneity of alloreactive natural killer cell function in kidney transplantation
Source: PubMed Central journal article supplement (PMC10508724; doi:10.1101/2023.09.01.555962), 2023-09-05
Supplement: media-1.pdf [file media-1.pdf]

**Supplementary Table 1A. Regression model of 2-year eGFR in CTOT01**

|                          | Estimate       | P Val          |
|--------------------------|----------------|----------------|
| Intercept                | 57.9776        | 1e-04*         |
| Thymoglobulin            | 1.0779         | 0.8784         |
| Induction                | -2.0563        | 0.8366         |
| <b>Living transplant</b> | <b>22.537</b>  | <b>0.0024*</b> |
| Delayed Graft Function   | 16.121         | 0.4734         |
| Acute Rejection          | -1.8902        | 0.807          |
| HLA-A/B/C mismatch       | -1.0399        | 0.5746         |
| <b>%Ksp37+</b>           | <b>-4.8639</b> | <b>0.0408*</b> |

**Supplementary Table 1B. Regression model of 2-year eGFR in CTOT01**

|                          | Estimate       | P Val          |
|--------------------------|----------------|----------------|
| Intercept                | 60.0487        | 2e-04*         |
| Thymoglobulin            | 1.1814         | 0.8665         |
| Induction                | -2.5122        | 0.8018         |
| <b>Living transplant</b> | <b>21.8542</b> | <b>0.0041*</b> |
| Delayed Graft Function   | 16.395         | 0.4649         |
| Acute Rejection          | -1.7256        | 0.823          |
| HLA-A/B/DR mismatch      | -1.3429        | 0.5145         |
| <b>%Ksp37+</b>           | <b>-4.8235</b> | <b>0.0424*</b> |

**Supplementary Table 2A. Regression model of 5-year eGFR in CTOT01**

|                        | Estimate      | P Val          |
|------------------------|---------------|----------------|
| Intercept              | 66.9669       | 1e-04*         |
| Thymoglobulin          | -4.8275       | 0.5345         |
| Induction              | -10.0663      | 0.3842         |
| Living transplant      | 9.8193        | 0.2241         |
| Delayed Graft Function | 25.4289       | 0.3582         |
| Acute rejection        | 4.7733        | 0.5894         |
| HLA-A/B/C mismatch     | -0.4782       | 0.821          |
| <b>%Ksp37+</b>         | <b>-5.992</b> | <b>0.0229*</b> |

**Supplementary Table 2B. Regression model of 5-year eGFR in CTOT01**

|                        | Estimate      | P Val          |
|------------------------|---------------|----------------|
| Intercept              | 69.9433       | 1e-04*         |
| Thymoglobulin          | -4.8539       | 0.5306         |
| Induction              | -10.4846      | 0.3657         |
| Living transplant      | 9.032         | 0.273          |
| Delayed Graft Function | 26.3281       | 0.3401         |
| Acute rejection        | 4.8964        | 0.5792         |
| HLA-A/B/DR mismatch    | -1.0378       | 0.6293         |
| <b>%Ksp37+</b>         | <b>-5.961</b> | <b>0.0232*</b> |

**Supplementary Table 3A. Regression model of 6-month eGFR in CTOT19**

|                        | Estimate      | P Val          |
|------------------------|---------------|----------------|
| Intercept              | 54.749        | 0*             |
| Delayed Graft Function | -0.443        | 0.9648         |
| <b>%Ksp37+</b>         | <b>-1.825</b> | <b>0.0321*</b> |

**Supplementary Table 3B. Regression model of 6-month eGFR in CTOT19**

|                    | Estimate      | P Val         |
|--------------------|---------------|---------------|
| Intercept          | 64.2575       | 0*            |
| HLA-A/B/C mismatch | -2.8126       | 0.1524        |
| <b>%Ksp37+</b>     | <b>-1.533</b> | <b>0.0639</b> |

**Supplementary Table 3C. Regression model of 6-month eGFR in CTOT19**

|                 | Estimate       | P Val          |
|-----------------|----------------|----------------|
| Intercept       | 55.7924        | 0*             |
| Acute Rejection | -5.4084        | 0.7523         |
| <b>%Ksp37+</b>  | <b>-2.0835</b> | <b>0.0308*</b> |

**Supplementary Table 4A. Regression model of 2-year eGFR in CTOT19**

|                        | Estimate      | P Val          |
|------------------------|---------------|----------------|
| Intercept              | 64.5813       | 0*             |
| Delayed Graft Function | -3.6054       | 0.7628         |
| <b>%Ksp37+</b>         | <b>-2.011</b> | <b>0.0454*</b> |

**Supplementary Table 4B. Regression model of 2-year eGFR in CTOT19**

|                    | Estimate       | P Val         |
|--------------------|----------------|---------------|
| Intercept          | 70.9803        | 0*            |
| HLA-A/B/C mismatch | -2.1225        | 0.3716        |
| <b>%Ksp37+</b>     | <b>-1.7936</b> | <b>0.0761</b> |

**Supplementary Table 4C. Regression model of 2-year eGFR in CTOT19**

|                 | Estimate     | P Val         |
|-----------------|--------------|---------------|
| Intercept       | 64.0183      | 0*            |
| Acute Rejection | -8.7277      | 0.6709        |
| <b>%Ksp37+</b>  | <b>-2.13</b> | <b>0.0611</b> |

**Supplementary Table 5. Class I HLA alleles and KIR ligands in CTOT01**

|               | HLA-A    |          |         | HLA-B    |          |         |                | HLA-C    |          |         |
|---------------|----------|----------|---------|----------|----------|---------|----------------|----------|----------|---------|
|               | Allele 1 | Allele 2 | Ligands | Allele 1 | Allele 2 | Ligands | -21 Dimorphism | Allele 1 | Allele 2 | Ligands |
| Donor #1      | 02:02    | 30:01    | NA      | 07:02    | 53:01    | Bw4/Bw6 | MT             | 04:01    | 07:02    | C1/C2   |
| Recipient #1  | 02:02    | 30:01    | NA      | 42:01    | 53:01    | Bw4/Bw6 | MT             | 04:01    | 17:01    | C2/C2   |
| Donor #2      | 01:01    | 32:01    | Bw4     | 08:01    | 40:01    | Bw6/Bw6 | MT             | 02:02    | 07:01    | C1/C2   |
| Recipient #2  | 02:01    | 03:01    | A03     | 08:01    | 38:01    | Bw4/Bw6 | MM             | 07:01    | 12:03    | C1/C1   |
| Donor #3      | 01:01    | 24:02    | Bw4     | 08:01    | 35:03    | Bw6/Bw6 | MT             | 04:01    | 07:01    | C1/C2   |
| Recipient #3  | 01:01    | 24:02    | Bw4     | 08:01    | 35:03    | Bw6/Bw6 | MT             | 04:01    | 07:01    | C1/C2   |
| Donor #4      | 02:01    | 02:01    | NA      | 40:02    | 44:02    | Bw4/Bw6 | TT             | 02:02    | 05:01    | C2/C2   |
| Recipient #4  | 01:01    | 02:01    | NA      | 40:02    | 57:01    | Bw4/Bw6 | TT             | 02:02    | 06:02    | C2/C2   |
| Donor #5      | 30:01    | 74:01    | NA      | 08:01    | 44:03    | Bw4/Bw6 | MT             | 07:01    | 14:03    | C1/C1   |
| Recipient #5  | 32:01    | 74:01    | Bw4     | 08:01    | 81:01    | Bw6/Bw6 | MM             | 07:01    | 08:04    | C1/C1   |
| Donor #6      | 01:01    | 24:02    | Bw4     | 07:05    | 35:02    | Bw6/Bw6 | MT             | 04:01    | 15:05    | C2/C2   |
| Recipient #6  | 23:01    | 24:02    | Bw4/Bw4 | 27:05    | 44:27    | Bw4/Bw4 | TT             | 01:02    | 07:04    | C1/C1   |
| Donor #7      | 68:01    | 68:01    | NA      | 15:15    | 35:01    | Bw6/Bw6 | TT             | 01:02    | 07:02    | C1/C1   |
| Recipient #7  | 01:03    | 24:02    | Bw4     | 15:01    | 73:01    | Bw6/Bw6 | MT             | 03:04    | 15:05    | C1/C2   |
| Donor #8      | 01:01    | 32:01    | Bw4     | 08:01    | 14:01    | Bw6/Bw6 | MM             | 07:01    | 08:02    | C1/C1   |
| Recipient #8  | 02:01    | 03:01    | A03     | 35:01    | 51:01    | Bw4/Bw6 | TT             | 04:01    | 15:02    | C2/C2   |
| Donor #9      | 02:01    | 32:01    | Bw4     | 07:02    | 14:01    | Bw6/Bw6 | MM             | 07:02    | 08:02    | C1/C1   |
| Recipient #9  | 02:01    | 02:01    | NA      | 07:02    | 08:01    | Bw6/Bw6 | MM             | 07:01    | 07:02    | C1/C1   |
| Donor #10     | 02:05    | 31:01    | NA      | 35:08    | 41:01    | Bw6/Bw6 | TT             | 04:01    | 07:01    | C1/C2   |
| Recipient #10 | 23:01    | 66:01    | Bw4     | 08:01    | 58:02    | Bw4/Bw6 | MT             | 03:04    | 06:02    | C1/C2   |
| Donor #11     | 01:01    | 03:01    | A03     | 07:02    | 08:01    | Bw6/Bw6 | MM             | 07:01    | 07:02    | C1/C1   |
| Recipient #11 | 01:01    | 03:01    | A03     | 07:02    | 08:01    | Bw6/Bw6 | MM             | 07:01    | 07:02    | C1/C1   |
| Donor #12     | 30:02    | 33:03    | NA      | 15:16    | 57:03    | Bw4/Bw4 | TT             | 07:01    | 14:02    | C1/C1   |
| Recipient #12 | 34:02    | 36:01    | NA      | 35:01    | 53:01    | Bw4/Bw6 | TT             | 04:01    | 04:01    | C2/C2   |
| Donor #13     | 23:01    | 33:03    | Bw4     | 15:16    | 53:01    | Bw4/Bw4 | TT             | 06:02    | 14:02    | C1/C2   |
| Recipient #13 | 23:01    | 30:02    | Bw4     | 53:01    | 58:02    | Bw4/Bw4 | TT             | 06:02    | 06:02    | C2/C2   |
| Donor #14     | 01:01    | 24:02    | Bw4     | 07:02    | 08:01    | Bw6/Bw6 | MM             | 07:01    | 07:02    | C1/C1   |
| Recipient #14 | 01:01    | 03:01    | A03     | 08:01    | 15:18    | Bw6/Bw6 | MT             | 07:01    | 07:04    | C1/C1   |
| Donor #15     | 02:01    | 66:01    | NA      | 39:01    | 58:02    | Bw4/Bw6 | MT             | 06:02    | 07:02    | C1/C2   |
| Recipient #15 | 02:01    | 33:03    | NA      | 35:01    | 53:01    | Bw4/Bw6 | TT             | 04:01    | 16:01    | C1/C2   |
| Donor #16     | 02:01    | 32:01    | Bw4     | 14:01    | 44:02    | Bw4/Bw6 | MT             | 05:01    | 08:02    | C1/C2   |
| Recipient #16 | 02:01    | 03:01    | A03     | 40:01    | 40:02    | Bw6/Bw6 | TT             | 02:02    | 03:04    | C1/C2   |
| Donor #17     | 26:01    | 32:01    | Bw4     | 41:02    | 44:02    | Bw4/Bw6 | TT             | 05:01    | 17:03    | C2/C2   |
| Recipient #17 | 26:01    | 32:01    | Bw4     | 08:01    | 44:02    | Bw4/Bw6 | MT             | 05:01    | 07:02    | C1/C2   |
| Donor #18     | 02:01    | 03:01    | A03     | 07:02    | 40:02    | Bw6/Bw6 | MT             | 02:02    | 07:02    | C1/C2   |
| Recipient #18 | 02:01    | 25:01    | NA      | 18:01    | 27:02    | Bw4/Bw6 | TT             | 02:02    | 12:03    | C1/C2   |
| Donor #19     | 02:01    | 24:02    | Bw4     | 07:02    | 44:02    | Bw4/Bw6 | MT             | 05:01    | 07:02    | C1/C2   |
| Recipient #19 | 01:01    | 24:02    | Bw4     | 27:05    | 44:02    | Bw4/Bw4 | TT             | 02:02    | 05:01    | C2/C2   |
| Donor #20     | 02:01    | 24:02    | Bw4     | 40:01    | 40:02    | Bw6/Bw6 | TT             | 03:04    | 03:04    | C1/C1   |
| Recipient #20 | 02:01    | 03:01    | A03     | 40:01    | 49:01    | Bw4/Bw6 | TT             | 03:04    | 07:01    | C1/C1   |
| Donor #21     | 02:01    | 30:02    | NA      | 13:02    | 18:01    | Bw4/Bw6 | TT             | 05:01    | 06:02    | C2/C2   |
| Recipient #21 | 30:02    | 68:01    | NA      | 08:01    | 18:01    | Bw6/Bw6 | MT             | 05:01    | 07:01    | C1/C2   |
| Donor #22     | 24:02    | 31:01    | Bw4     | 51:01    | 51:01    | Bw4/Bw4 | TT             | 05:01    | 14:02    | C1/C2   |
| Recipient #22 | 02:01    | 03:01    | A03     | 07:02    | 15:01    | Bw6/Bw6 | MT             | 04:01    | 07:02    | C1/C2   |
| Donor #23     | 02:01    | 24:02    | Bw4     | 44:02    | 51:01    | Bw4/Bw4 | TT             | 05:01    | 16:02    | C2/C2   |

|               |       |       |         |       |       |         |    |       |       |       |
|---------------|-------|-------|---------|-------|-------|---------|----|-------|-------|-------|
| Recipient #23 | 01:01 | 24:02 | Bw4     | 08:01 | 51:01 | Bw4/Bw6 | MT | 07:01 | 16:02 | C1/C2 |
| Donor #24     | 01:01 | 31:01 | NA      | 51:01 | 52:01 | Bw4/Bw4 | TT | 02:02 | 12:02 | C1/C2 |
| Recipient #24 | 01:01 | 02:01 | NA      | 44:02 | 52:01 | Bw4/Bw4 | TT | 05:01 | 12:02 | C1/C2 |
| Donor #25     | 01:01 | 01:01 | NA      | 08:01 | 15:01 | Bw6/Bw6 | MT | 03:04 | 07:01 | C1/C1 |
| Recipient #25 | 01:01 | 03:01 | A03     | 08:01 | 53:01 | Bw4/Bw6 | MT | 04:01 | 07:01 | C1/C2 |
| Donor #26     | 24:02 | 32:01 | Bw4/Bw4 | 40:01 | 44:02 | Bw4/Bw6 | TT | 03:04 | 05:01 | C1/C2 |
| Recipient #26 | 24:02 | 25:01 | Bw4     | 39:01 | 44:02 | Bw4/Bw6 | MT | 05:01 | 12:03 | C1/C2 |
| Donor #27     | 01:01 | 03:01 | A03     | 07:02 | 08:01 | Bw6/Bw6 | MM | 07:01 | 07:02 | C1/C1 |
| Recipient #27 | 02:NA | 24:02 | Bw4     | 52:NA | 44:02 | Bw4     | TT | 05:01 | 07:02 | C1/C2 |
| Donor #28     | 30:01 | 30:01 | NA      | 42:01 | 42:01 | Bw6/Bw6 | MM | 17:01 | 17:01 | C2/C2 |
| Recipient #28 | 03:01 | 33:03 | A03     | 07:02 | 53:01 | Bw4/Bw6 | MT | 04:01 | 07:02 | C1/C2 |
| Donor #29     | 02:01 | 02:01 | NA      | 14:01 | 44:02 | Bw4/Bw6 | MT | 05:01 | 08:02 | C1/C2 |
| Recipient #29 | 29:02 | 36:01 | NA      | 45:01 | 53:01 | Bw4/Bw6 | TT | 04:01 | 16:01 | C1/C2 |
| Donor #30     | 30:01 | 30:02 | NA      | 42:01 | 58:01 | Bw4/Bw6 | MT | 07:01 | 17:01 | C1/C2 |
| Recipient #30 | 02:01 | 30:02 | NA      | 07:02 | 58:01 | Bw4/Bw6 | MT | 07:01 | 07:02 | C1/C1 |
| Donor #31     | 01:01 | 32:01 | Bw4     | 08:01 | 55:01 | Bw6/Bw6 | MT | 05:01 | 07:01 | C1/C2 |
| Recipient #31 | 01:01 | 02:01 | NA      | 08:01 | 15:03 | Bw6/Bw6 | MT | 02:10 | 07:01 | C1/C2 |
| Donor #32     | 02:01 | 32:01 | Bw4     | 15:01 | 44:02 | Bw4/Bw6 | TT | 03:03 | 05:01 | C1/C2 |
| Recipient #32 | 02:01 | 32:01 | Bw4     | 15:01 | 44:02 | Bw4/Bw6 | TT | 03:03 | 05:01 | C1/C2 |
| Donor #33     | 02:01 | 02:01 | NA      | 08:01 | 40:01 | Bw6/Bw6 | MT | 03:04 | 07:01 | C1/C1 |
| Recipient #33 | 02:01 | 29:02 | NA      | 40:01 | 44:03 | Bw4/Bw6 | TT | 03:04 | 16:01 | C1/C1 |
| Donor #34     | 02:01 | 31:01 | NA      | 44:02 | 51:01 | Bw4/Bw4 | TT | 05:01 | 15:02 | C2/C2 |
| Recipient #34 | 02:01 | 31:01 | NA      | 48:01 | 51:01 | Bw4/Bw6 | MT | 08:01 | 15:02 | C1/C2 |
| Donor #35     | 02:01 | 68:01 | NA      | 35:01 | 44:02 | Bw4/Bw6 | TT | 05:01 | 15:02 | C2/C2 |
| Recipient #35 | 29:02 | 68:01 | NA      | 35:01 | 44:03 | Bw4/Bw6 | TT | 15:02 | 16:01 | C1/C2 |
| Donor #36     | 02:01 | 32:01 | Bw4     | 15:01 | 39:01 | Bw6/Bw6 | MT | 03:04 | 07:02 | C1/C1 |
| Recipient #36 | 01:01 | 32:01 | Bw4     | 07:02 | 39:01 | Bw6/Bw6 | MM | 07:02 | 07:02 | C1/C1 |
| Donor #37     | 01:01 | 11:01 | A11     | 49:01 | 51:01 | Bw4/Bw4 | TT | 07:01 | 15:02 | C1/C2 |
| Recipient #37 | 02:01 | 03:01 | A03     | 07:02 | 15:01 | Bw6/Bw6 | MT | 03:04 | 07:02 | C1/C1 |
| Donor #38     | 02:01 | 02:04 | NA      | 40:01 | 51:01 | Bw4/Bw6 | TT | 03:04 | 15:02 | C1/C2 |
| Recipient #38 | 24:02 | 24:02 | Bw4/Bw4 | 07:02 | 44:03 | Bw4/Bw6 | MT | 04:01 | 07:02 | C1/C2 |
| Donor #39     | 03:01 | 29:02 | A03     | 14:02 | 44:03 | Bw4/Bw6 | MT | 08:02 | 16:01 | C1/C1 |
| Recipient #39 | 02:01 | 24:02 | Bw4     | 40:01 | 45:01 | Bw6/Bw6 | TT | 03:04 | 16:01 | C1/C1 |
| Donor #40     | 01:01 | 11:01 | A11     | 08:01 | 56:01 | Bw6/Bw6 | MT | 01:02 | 07:01 | C1/C1 |
| Recipient #40 | 02:01 | 29:01 | NA      | 18:01 | 57:01 | Bw4/Bw6 | TT | 06:02 | 07:01 | C1/C2 |
| Donor #41     | 01:01 | 32:01 | Bw4     | 13:02 | 40:02 | Bw4/Bw6 | TT | 02:02 | 06:02 | C2/C2 |
| Recipient #41 | 01:01 | 02:01 | NA      | 08:01 | 15:01 | Bw6/Bw6 | MT | 03:03 | 07:01 | C1/C1 |
| Donor #42     | 23:01 | 34:02 | Bw4     | 15:03 | 52:01 | Bw4/Bw6 | TT | 02:10 | 16:01 | C1/C2 |
| Recipient #42 | 11:01 | 29:02 | A11     | 07:02 | 07:02 | Bw6/Bw6 | MM | 07:02 | 07:02 | C1/C1 |
| Donor #43     | 34:02 | 74:01 | NA      | 44:03 | 57:03 | Bw4/Bw4 | TT | 04:01 | 07:01 | C1/C2 |
| Recipient #43 | 02:02 | 34:02 | NA      | 15:16 | 44:03 | Bw4/Bw4 | TT | 04:01 | 14:02 | C1/C2 |
| Donor #44     | 01:01 | 23:17 | Bw4     | 08:01 | 15:03 | Bw6/Bw6 | MT | 02:10 | 07:02 | C1/C2 |
| Recipient #44 | 25:01 | 30:01 | NA      | 07:02 | 53:01 | Bw4/Bw6 | MT | 04:01 | 07:02 | C1/C2 |
| Donor #45     | 03:01 | 68:02 | A03     | 15:10 | 15:10 | Bw6/Bw6 | TT | 03:04 | 03:04 | C1/C1 |
| Recipient #45 | 23:01 | 68:02 | Bw4     | 07:02 | 15:10 | Bw6/Bw6 | MT | 03:04 | 15:05 | C1/C2 |
| Donor #46     | 02:03 | 26:01 | NA      | 39:09 | 52:01 | Bw4/Bw6 | MT | 07:02 | 07:02 | C1/C1 |
| Recipient #46 | 68:02 | 68:02 | NA      | 15:10 | 35:01 | Bw6/Bw6 | TT | 03:04 | 04:01 | C1/C2 |
| Donor #47     | 03:01 | 29:02 | A03     | 07:02 | 44:03 | Bw4/Bw6 | MT | 07:02 | 16:01 | C1/C1 |

|               |       |       |         |       |       |         |    |       |       |       |
|---------------|-------|-------|---------|-------|-------|---------|----|-------|-------|-------|
| Recipient #47 | 03:01 | 29:02 | A03     | 07:02 | 44:03 | Bw4/Bw6 | MT | 04:01 | 07:02 | C1/C2 |
| Donor #48     | 02:01 | 03:01 | A03     | 14:02 | 51:01 | Bw4/Bw6 | MT | 08:02 | 12:03 | C1/C1 |
| Recipient #48 | 03:01 | 26:01 | A03     | 15:01 | 38:01 | Bw4/Bw6 | MT | 03:03 | 12:03 | C1/C1 |
| Donor #49     | 02:01 | 03:01 | A03     | 14:02 | 51:01 | Bw4/Bw6 | MT | 08:02 | 12:03 | C1/C1 |
| Recipient #49 | 11:01 | 23:01 | A11/Bw4 | 57:01 | 58:01 | Bw4/Bw4 | TT | 06:02 | 07:18 | C1/C2 |
| Donor #50     | 03:01 | 68:02 | A03     | 14:02 | 57:01 | Bw4/Bw6 | MT | 06:02 | 08:02 | C1/C2 |
| Recipient #50 | 02:01 | 11:01 | A11     | 18:01 | 35:01 | Bw6/Bw6 | TT | 04:01 | 07:01 | C1/C2 |
| Donor #51     | 33:03 | 68:01 | NA      | 51:01 | 58:02 | Bw4/Bw4 | TT | 06:02 | 16:01 | C1/C2 |
| Recipient #51 | 29:02 | 66:01 | NA      | 44:03 | 58:02 | Bw4/Bw4 | TT | 04:01 | 06:02 | C2/C2 |
| Donor #52     | 23:01 | 32:01 | Bw4/Bw4 | 13:02 | 50:01 | Bw4/Bw6 | TT | 06:02 | 06:02 | C2/C2 |
| Recipient #52 | 02:01 | 23:01 | Bw4     | 27:05 | 50:01 | Bw4/Bw6 | TT | 01:02 | 06:02 | C1/C2 |
| Donor #53     | 01:01 | 25:01 | NA      | 08:01 | 58:01 | Bw4/Bw6 | MT | 07:01 | 07:18 | C1/C1 |
| Recipient #53 | 01:01 | 25:01 | NA      | 08:01 | 58:01 | Bw4/Bw6 | MT | 07:01 | 07:18 | C1/C1 |
| Donor #54     | 02:01 | 24:02 | Bw4     | 15:01 | 44:02 | Bw4/Bw6 | TT | 03:03 | 05:01 | C1/C2 |
| Recipient #54 | 29:02 | 66:01 | NA      | 47:03 | 53:01 | Bw4/Bw6 | TT | 04:01 | 07:01 | C1/C2 |
| Donor #55     | 02:01 | 68:01 | NA      | 35:01 | 35:08 | Bw6/Bw6 | TT | 02:02 | 04:01 | C2/C2 |
| Recipient #55 | 30:01 | 74:01 | NA      | 35:01 | 53:01 | Bw4/Bw6 | TT | 04:01 | 04:01 | C2/C2 |
| Donor #56     | 01:01 | 02:01 | NA      | 08:01 | 44:02 | Bw4/Bw6 | MT | 05:01 | 07:01 | C1/C2 |
| Recipient #56 | 03:01 | 11:01 | A03/A11 | 35:01 | 53:01 | Bw4/Bw6 | TT | 04:01 | 04:01 | C2/C2 |
| Donor #57     | 30:02 | 68:01 | NA      | 49:01 | 51:01 | Bw4/Bw4 | TT | 07:01 | 15:02 | C1/C2 |
| Recipient #57 | 02:01 | 29:02 | NA      | 07:06 | 35:01 | Bw6/Bw6 | MT | 04:01 | 07:02 | C1/C2 |
| Donor #58     | 02:01 | 02:01 | NA      | 15:01 | 18:01 | Bw6/Bw6 | TT | 03:04 | 12:03 | C1/C1 |
| Recipient #58 | 02:01 | 33:03 | NA      | 07:02 | 53:01 | Bw4/Bw6 | MT | 04:01 | 07:02 | C1/C2 |
| Donor #59     | 02:05 | 23:01 | Bw4     | 44:03 | 50:01 | Bw4/Bw6 | TT | 04:01 | 06:02 | C2/C2 |
| Recipient #59 | 03:01 | 23:01 | A03/Bw4 | 07:02 | 44:03 | Bw4/Bw6 | MT | 04:01 | 07:02 | C1/C2 |
| Donor #60     | 02:01 | 23:01 | Bw4     | 49:01 | 51:01 | Bw4/Bw4 | TT | 03:03 | 07:01 | C1/C1 |
| Recipient #60 | 02:01 | 26:01 | NA      | 38:01 | 55:01 | Bw4/Bw6 | MT | 03:03 | 12:03 | C1/C1 |
| Donor #61     | 01:01 | 03:01 | A03     | 35:01 | 57:01 | Bw4/Bw6 | TT | 04:01 | 06:02 | C2/C2 |
| Recipient #61 | 01:01 | 03:01 | A03     | 35:01 | 57:01 | Bw4/Bw6 | TT | 04:01 | 06:02 | C2/C2 |
| Donor #62     | 24:02 | 32:01 | Bw4/Bw4 | 35:01 | 57:01 | Bw4/Bw6 | TT | 03:03 | 06:02 | C1/C2 |
| Recipient #62 | 03:01 | 23:01 | A03/Bw4 | 15:03 | 42:01 | Bw6/Bw6 | MT | 02:10 | 17:01 | C2/C2 |
| Donor #63     | 11:01 | 33:03 | A11     | 07:02 | 18:01 | Bw6/Bw6 | MT | 05:01 | 15:05 | C2/C2 |
| Recipient #63 | 11:01 | 32:01 | A11/Bw4 | 08:01 | 18:01 | Bw6/Bw6 | MT | 05:01 | 07:01 | C1/C2 |
| Donor #64     | 36:01 | 68:01 | NA      | 52:01 | 53:01 | Bw4/Bw4 | TT | 04:01 | 16:01 | C1/C2 |
| Recipient #64 | 02:02 | 68:01 | NA      | 15:03 | 52:01 | Bw4/Bw6 | TT | 02:10 | 16:01 | C1/C2 |
| Donor #65     | 02:01 | 68:02 | NA      | 14:02 | 44:02 | Bw4/Bw6 | MT | 05:09 | 08:02 | C1/C2 |
| Recipient #65 | 02:01 | 30:01 | NA      | 15:03 | 40:02 | Bw6/Bw6 | TT | 02:10 | 15:02 | C2/C2 |
| Donor #66     | 68:01 | 68:02 | NA      | 45:01 | 49:01 | Bw4/Bw6 | TT | 06:02 | 07:01 | C1/C2 |
| Recipient #66 | 02:01 | 24:02 | Bw4     | 35:01 | 35:12 | Bw6/Bw6 | TT | 04:01 | 04:01 | C2/C2 |
| Donor #67     | 01:01 | 74:01 | NA      | 08:01 | 35:01 | Bw6/Bw6 | MT | 07:01 | 07:01 | C1/C1 |
| Recipient #67 | 01:01 | 33:03 | NA      | 18:01 | 57:03 | Bw4/Bw6 | TT | 04:01 | 07:01 | C1/C2 |
| Donor #68     | 02:05 | 23:01 | Bw4     | 07:02 | 35:01 | Bw6/Bw6 | MT | 04:01 | 07:01 | C1/C2 |
| Recipient #68 | 23:01 | 30:02 | Bw4     | 15:10 | 35:01 | Bw6/Bw6 | TT | 03:04 | 07:01 | C1/C1 |
| Donor #69     | 03:01 | 30:02 | A03     | 14:03 | 42:02 | Bw6/Bw6 | MM | 08:02 | 17:01 | C1/C2 |
| Recipient #69 | 30:02 | 33:03 | NA      | 42:02 | 58:01 | Bw4/Bw6 | MT | 03:02 | 17:01 | C1/C2 |
| Donor #70     | 03:01 | 74:01 | A03     | 07:02 | 35:01 | Bw6/Bw6 | MT | 07:01 | 07:02 | C1/C1 |
| Recipient #70 | 02:01 | 03:01 | A03     | 35:01 | 45:01 | Bw6/Bw6 | TT | 07:01 | 16:01 | C1/C1 |

**Supplementary Table 6. Class I HLA allele and KIR ligands in CTOT19**

| ID            | HLA-A    |          |         | HLA-B    |          |         |                | HLA-C    |          |         |
|---------------|----------|----------|---------|----------|----------|---------|----------------|----------|----------|---------|
|               | Allele 1 | Allele 2 | Ligands | Allele 1 | Allele 2 | Ligands | -21 Dimorphism | Allele 1 | Allele 2 | Ligands |
| Donor #1      | 02:01    | 25:01    | NA      | 55:01    | 58:01    | Bw4/Bw6 | TT             | 03:03    | 07:18    | C1/C1   |
| Recipient #1  | 74:01    | 74:01    | NA      | 27:05    | 35:01    | Bw4/Bw6 | TT             | 02:10    | 04:01    | C2/C2   |
| Donor #2      | 01:01    | 03:01    | A03     | 35:01    | 44:02    | Bw4/Bw6 | TT             | 04:01    | 05:01    | C2/C2   |
| Recipient #2  | 03:01    | 68:01    | A03     | 07:02    | 44:02    | Bw4/Bw6 | MT             | 05:01    | 07:02    | C1/C2   |
| Donor #3      | 01:01    | 02:01    | NA      | 15:01    | 50:02    | Bw6/Bw6 | TT             | 03:03    | 06:02    | C1/C2   |
| Recipient #3  | 01:01    | 02:01    | NA      | 15:01    | 50:02    | Bw6/Bw6 | TT             | 03:03    | 06:02    | C1/C2   |
| Donor #4      | 26:01    | 30:02    | NA      | 07:02    | 51:01    | Bw4/Bw6 | MT             | 07:02    | 14:02    | C1/C1   |
| Recipient #4  | 03:01    | 30:02    | A03     | 07:02    | 57:03    | Bw4/Bw6 | MT             | 07:02    | 07:18    | C1/C1   |
| Donor #5      | 02:01    | 24:02    | Bw4     | 07:02    | 15:01    | Bw6/Bw6 | MT             | 03:04    | 07:02    | C1/C1   |
| Recipient #5  | 02:01    | 24:02    | Bw4     | 07:02    | 15:01    | Bw6/Bw6 | MT             | 03:04    | 07:02    | C1/C1   |
| Donor #6      | 24:02    | 30:01    | Bw4     | 13:02    | 39:06    | Bw4/Bw6 | MT             | 06:02    | 07:02    | C1/C2   |
| Recipient #6  | 30:01    | 33:03    | NA      | 42:01    | 53:01    | Bw4/Bw6 | MT             | 04:01    | 17:01    | C2/C2   |
| Donor #7      | 02:01    | 68:02    | NA      | 15:10    | 44:02    | Bw4/Bw6 | TT             | 03:04    | 05:01    | C1/C2   |
| Recipient #7  | 02:01    | 68:01    | NA      | 15:18    | 44:02    | Bw4/Bw6 | TT             | 05:01    | 07:04    | C1/C2   |
| Donor #8      | 24:02    | 30:01    | Bw4     | 18:01    | 42:01    | Bw6/Bw6 | MT             | 07:01    | 17:01    | C1/C2   |
| Recipient #8  | 30:01    | 30:01    | NA      | 15:03    | 42:01    | Bw6/Bw6 | MT             | 02:10    | 17:01    | C2/C2   |
| Donor #9      | 02:01    | 26:01    | NA      | 18:01    | 38:01    | Bw4/Bw6 | MT             | 07:01    | 12:03    | C1/C1   |
| Recipient #9  | 03:01    | 68:02    | A03     | 42:01    | 44:02    | Bw4/Bw6 | MT             | 07:04    | 17:01    | C1/C2   |
| Donor #10     | 01:01    | 26:01    | NA      | 27:05    | 44:03    | Bw4/Bw4 | TT             | 01:02    | 04:01    | C1/C2   |
| Recipient #10 | 01:01    | 26:01    | NA      | 27:05    | 44:03    | Bw4/Bw4 | TT             | 01:02    | 04:01    | C1/C2   |
| Donor #11     | 02:01    | 02:01    | NA      | 44:02    | 51:01    | Bw4/Bw4 | TT             | 05:01    | 15:02    | C2/C2   |
| Recipient #11 | 02:01    | 24:02    | Bw4     | 15:01    | 35:01    | Bw6/Bw6 | TT             | 04:01    | 04:01    | C2/C2   |
| Donor #12     | 11:01    | 31:01    | A11     | 40:02    | 44:03    | Bw4/Bw6 | TT             | 03:04    | 16:01    | C1/C1   |
| Recipient #12 | 02:01    | 66:01    | NA      | 15:15    | 41:02    | Bw6/Bw6 | TT             | 01:02    | 17:03    | C1/C2   |
| Donor #13     | 03:01    | 68:01    | A03     | 18:01    | 51:01    | Bw4/Bw6 | TT             | 05:01    | 15:02    | C2/C2   |
| Recipient #13 | 03:01    | 68:01    | A03     | 18:01    | 51:01    | Bw4/Bw6 | TT             | 05:01    | 15:02    | C2/C2   |
| Donor #14     | 11:01    | 24:02    | A11/Bw4 | 15:01    | 18:01    | Bw6/Bw6 | TT             | 03:03    | 12:03    | C1/C1   |
| Recipient #14 | 30:01    | 30:02    | NA      | 15:03    | 42:01    | Bw6/Bw6 | MT             | 02:10    | 17:01    | C2/C2   |
| Donor #15     | 23:01    | 31:01    | Bw4     | 44:03    | 55:01    | Bw4/Bw6 | TT             | 03:03    | 04:09    | C1/C2   |
| Recipient #15 | 01:01    | 03:01    | A03     | 07:02    | 40:01    | Bw6/Bw6 | MT             | 03:04    | 07:02    | C1/C1   |
| Donor #16     | 23:01    | 31:01    | Bw4     | 44:03    | 55:01    | Bw4/Bw6 | TT             | 03:03    | 04:09    | C1/C2   |
| Recipient #16 | 01:01    | 02:01    | NA      | 08:01    | 49:01    | Bw4/Bw6 | MT             | 07:01    | 07:01    | C1/C1   |
| Donor #17     | 24:02    | 29:02    | Bw4     | 13:02    | 55:01    | Bw4/Bw6 | TT             | 01:02    | 06:02    | C1/C2   |
| Recipient #17 | 02:01    | 23:01    | Bw4     | 07:02    | 41:01    | Bw6/Bw6 | MT             | 07:01    | 07:02    | C1/C1   |
| Donor #18     | 01:01    | 32:01    | Bw4     | 15:01    | 51:01    | Bw4/Bw6 | TT             | 03:03    | 14:02    | C1/C1   |
| Recipient #18 | 11:01    | 31:01    | A11     | 44:02    | 51:01    | Bw4/Bw4 | TT             | 05:01    | 15:02    | C2/C2   |
| Donor #19     | 02:01    | 11:01    | A11     | 51:01    | 56:01    | Bw4/Bw6 | TT             | 01:02    | 02:02    | C1/C2   |
| Recipient #19 | 23:17    | 68:01    | Bw4     | 08:01    | 39:05    | Bw6/Bw6 | MM             | 07:01    | 07:02    | C1/C1   |
| Donor #20     | 11:01    | 24:02    | A11/Bw4 | 13:02    | 35:01    | Bw4/Bw6 | TT             | 04:01    | 06:02    | C2/C2   |
| Recipient #20 | 03:01    | 03:01    | A03/A03 | 35:01    | 45:01    | Bw6/Bw6 | TT             | 04:01    | 05:01    | C2/C2   |
| Donor #21     | 01:01    | 24:02    | Bw4     | 07:02    | 35:01    | Bw6/Bw6 | MT             | 04:01    | 07:02    | C1/C2   |
| Recipient #21 | 02:02    | 30:01    | NA      | 42:02    | 53:01    | Bw4/Bw6 | MT             | 04:01    | 17:01    | C2/C2   |



|               |       |       |     |       |       |         |    |       |       |       |
|---------------|-------|-------|-----|-------|-------|---------|----|-------|-------|-------|
| Donor #22     | 02:01 | 11:01 | A11 | 15:01 | 51:01 | Bw4/Bw6 | TT | 03:03 | 15:02 | C1/C2 |
| Recipient #22 | 02:01 | 03:01 | A03 | 07:02 | 51:01 | Bw4/Bw6 | MT | 07:02 | 14:02 | C1/C1 |
| Donor #23     | 24:02 | 26:01 | Bw4 | 38:01 | 48:01 | Bw4/Bw6 | MM | 08:03 | 12:03 | C1/C1 |
| Recipient #23 | 02:01 | 33:03 | NA  | 45:01 | 58:01 | Bw4/Bw6 | TT | 03:02 | 16:01 | C1/C1 |
| Donor #24     | 03:01 | 30:02 | A03 | 15:03 | 35:01 | Bw6/Bw6 | TT | 02:10 | 04:01 | C2/C2 |
| Recipient #24 | 66:01 | 68:02 | NA  | 35:01 | 41:02 | Bw6/Bw6 | TT | 16:01 | 17:03 | C1/C2 |
| Donor #25     | 02:01 | 68:03 | NA  | 39:05 | 52:01 | Bw4/Bw6 | MT | 03:03 | 07:02 | C1/C1 |
| Recipient #25 | 24:02 | 26:01 | Bw4 | 35:14 | 57:01 | Bw4/Bw6 | TT | 04:01 | 06:02 | C2/C2 |
| Donor #26     | 02:01 | 02:01 | NA  | 44:02 | 45:01 | Bw4/Bw6 | TT | 05:01 | 06:02 | C2/C2 |
| Recipient #26 | 02:01 | 02:01 | NA  | 44:02 | 45:01 | Bw4/Bw6 | TT | 05:01 | 06:02 | C2/C2 |

---

**Supplementary Table 7. Class I HLA allele and KIR ligands in healthy cohort**

| ID          | HLA-A    |          |         | HLA-B    |          |         |                | HLA-C    |          |         |
|-------------|----------|----------|---------|----------|----------|---------|----------------|----------|----------|---------|
|             | Allele 1 | Allele 2 | Ligands | Allele 1 | Allele 2 | Ligands | -21 Dimorphism | Allele 1 | Allele 2 | Ligands |
| Healthy #1  | 31:01    | 32:01    | Bw4     | 15:01    | 40:01    | Bw6/Bw6 | TT             | 03:03    | 03:04    | C1/C1   |
| Healthy #2  | 24:02    | 30:02    | Bw4     | 18:01    | 35:01    | Bw6/Bw6 | TT             | 04:01    | 06:02    | C2/C2   |
| Healthy #3  | 23:01    | 31:01    | Bw4     | 38:01    | 49:01    | Bw4/Bw4 | MT             | 07:01    | 12:03    | C1/C1   |
| Healthy #4  | 02:01    | 11:01    | A11     | 51:01    | 52:01    | Bw4/Bw4 | TT             | 12:02    | 15:02    | C1/C2   |
| Healthy #5  | 24:02    | 66:01    | Bw4     | 38:01    | 52:01    | Bw4/Bw4 | MT             | 12:02    | 12:03    | C1/C1   |
| Healthy #6  | 24:02    | 33:03    | Bw4     | 13:01    | 53:01    | Bw4/Bw4 | TT             | 03:04    | 04:01    | C1/C2   |
| Healthy #7  | 25:01    | 31:01    | NA      | 18:01    | 35:12    | Bw6/Bw6 | TT             | 04:01    | 12:03    | C1/C2   |
| Healthy #8  | 02:05    | 26:01    | NA      | 41:01    | 52:01    | Bw4/Bw6 | TT             | 07:01    | 12:02    | C1/C1   |
| Healthy #9  | 23:01    | 24:02    | Bw4/Bw4 | 18:01    | 18:01    | Bw6/Bw6 | TT             | 07:01    | 07:04    | C1/C1   |
| Healthy #10 | 02:01    | 03:01    | A03     | 35:01    | 51:01    | Bw4/Bw6 | TT             | 04:01    | 15:02    | C2/C2   |
| Healthy #11 | 02:01    | 30:04    | NA      | 44:02    | 49:01    | Bw4/Bw4 | TT             | 05:01    | 07:01    | C1/C2   |
| Healthy #12 | 32:01    | 33:01    | Bw4     | 08:01    | 14:02    | Bw6/Bw6 | MM             | 07:01    | 08:02    | C1/C1   |
| Healthy #13 | 24:02    | 26:01    | Bw4     | 18:01    | 38:01    | Bw4/Bw6 | MT             | 12:03    | 12:03    | C1/C1   |
| Healthy #14 | 01:01    | 02:01    | NA      | 08:01    | 57:01    | Bw4/Bw6 | MT             | 06:02    | 07:01    | C1/C2   |
| Healthy #15 | 30:02    | 68:01    | NA      | 15:03    | 53:01    | Bw4/Bw6 | TT             | 02:10    | 04:01    | C2/C2   |
| Healthy #16 | 02:01    | 26:01    | NA      | 08:01    | 53:01    | Bw4/Bw6 | MT             | 03:04    | 04:01    | C1/C2   |
| Healthy #17 | 11:01    | 24:02    | A11/Bw4 | 15:01    | 15:25    | Bw6/Bw6 | TT             | 03:03    | 07:26    | C1/C1   |
| Healthy #18 | 02:01    | 03:01    | A03     | 51:01    | 53:01    | Bw4/Bw4 | TT             | 01:02    | 16:01    | C1/C1   |
| Healthy #19 | 01:01    | 02:03    | NA      | 40:06    | 57:01    | Bw4/Bw6 | TT             | 06:02    | 15:02    | C2/C2   |
| Healthy #20 | 01:01    | 26:01    | NA      | 44:02    | 53:01    | Bw4/Bw4 | TT             | 04:01    | 05:01    | C2/C2   |

**Supplementary Table 8. Flow cytometry panel for profiling stimulator cell ligands**

|           | Antigen    | Vendor         | Catalog #   | Clone      |
|-----------|------------|----------------|-------------|------------|
| Panel 1   | HLA-A/B/C  | BioLegend      | 311418      | W6/32      |
|           | MICA/B     | BioLegend      | 320912      | 6D4        |
|           | CD86       | BioLegend      | 374214      | BU63       |
|           | HLA-F      | BioLegend      | 373208      | 3D11/HLA-F |
|           | CD112      | Miltenyi       | 130-122-770 | REA1195    |
| Panel 2   | CD80       | BioLegend      | 305225      | 2D10       |
|           | HLA-G      | BioLegend      | 335912      | 87G        |
|           | ULBP1      | R&D Systems    | FAB1380A    | 170818     |
|           | CD54       | BioLegend      | 353117      | HA58       |
|           | HLA-C      | BD Biosciences | 747594      | DT-9       |
| Panel 3   | CD155      | BioLegend      | 337634      | SKII.4     |
|           | HLA-E      | BioLegend      | 342604      | 3D12       |
|           | PD-L1      | BioLegend      | 329736      | 29E.2A3    |
|           | ULBP2/5/6  | R&D Systems    | FAB1298G    | 165903     |
|           | CD58       | BioLegend      | 330918      | TS2/9      |
| Viability | Zombie NIR | BioLegend      | 423105      |            |

**Supplementary Table 9. CyTOF Panel**

| Metal Conjugate | Antigen    | Vendor        | Catalog #                 | Clone          | Function                          |
|-----------------|------------|---------------|---------------------------|----------------|-----------------------------------|
| 89Y             | CD45       | Fluidigm      | 3089003B                  | HI30           | Lineage marker; leukocyte         |
| 111Cd           | LILRB1     | BioLegend     | 333702                    | GHI/75         | NK cell                           |
| 112Cd           | CD8        | BioLegend     | 301002                    | RPA-T8         | Lineage marker; T cell            |
| 113Cd           | CD38       | Miltenyi      | 130-122-307               | REA572         | NK cell, B cell                   |
| 114Cd           | CD3        | BioLegend     | 300402                    | UCHT1          | Lineage marker; T cell            |
| 115In           | CD14       | BioLegend     | 301802 & 301843           | M5E2           | Lineage marker; myeloid & other   |
| 115In           | CD19       | BioLegend     | 302202                    | HIB19          | Lineage marker; B cell            |
| 115In           | CD33       | BioLegend     | 303402                    | WM53           | Lineage marker; myeloid & other   |
| 116Cd           | CD57       | BioLegend     | 359602                    | HNK-1          | NK and T cell terminal maturation |
| 141Pr           | TCRvd2     | BioLegend     | 331402                    | B6             | T cell                            |
| 142Nd           | CCL4       | Miltenyi      | 130-095-212               | REA511         | NK cell effector function         |
| 143Nd           | XCL1       | R&D Sys       | AF695                     | 109001         | NK cell effector function         |
| 144Nd           | Ksp37      | BioLegend     | custom                    | TDA3           | NK cell effector function         |
| 145Nd           | NKG2D      | Miltenyi      | 130-122-332               | REA797         | NK cell                           |
| 146Nd           | DNAM-1     | Miltenyi      | 130-092-479 & 130-126-485 | DX11 & REA1040 | NK cell                           |
| 147Sm           | PLZF       | R&D Sys       | MAB2944                   | 6318100        | Transcription factor              |
| 148Nd           | KIR3DL1/L2 | Miltenyi      | 130-126-489               | REA970         | NK cell education                 |
| 149Sm           | CD25       | Fluidigm      | 3149010B                  | 2A3            | NK and T cell effector function   |
| 150Nd           | TCF-1/7    | BioLegend     | 655202                    | 7F11A10        | Transcription factor              |
| 151Eu           | CCL5       | R&D Sys       | MAB278-100                | 21445          | NK cell effector function         |
| 152Sm           | KIR3DL1    | Miltenyi      | 130-092-555               | DX9            | NK cell education                 |
| 153Eu           | TIM-3      | Fluidigm      | 3153008B                  | F38-2E2        | Exhaustion                        |
| 154Sm           | TIGIT      | Fluidigm      | 3154016B                  | MBSA43         | Exhaustion                        |
| 155Gd           | NKp46      | Miltenyi      | 130-124-522               | REA808         | NK cell                           |
| 156Gd           | KIR2DL2/L3 | Miltenyi      | 130-122-346               | REA1006        | NK cell education                 |
| 158Gd           | KIR2DL1    | Miltenyi      | 130-122-279               | REA284         | NK cell education                 |
| 159Tb           | CD56       | Miltenyi      | 130-108-016               | REA196         | NK cell                           |
| 160Gd           | NKG2A      | Miltenyi      | 130-122-329               | REA110         | NK cell education                 |
| 161Dy           | Ki-67      | Fluidigm      | 3161007B                  | B56            | Proliferation                     |
| 162Dy           | CD27       | Fluidigm      | 3162009B                  | L128           | NK cell, T cell, B cell           |
| 163Dy           | CXCR3      | Fluidigm      | 3163004B                  | G025H7         | NK and T cell effector function   |
| 164Dy           | NKG2C      | Miltenyi      | 130-122-278               | REA205         | NK cell                           |
| 165Ho           | KIR2DL3    | Miltenyi      | 130-122-280               | REA147         | NK cell education                 |
| 166Er           | KIR2DL1/S1 | Miltenyi      | 130-122-345               | REA1010        | NK cell education                 |
| 167Er           | FcεR1g     | EMD millipore | 06-727                    | polyclonal     | NK cell education                 |
| 168Er           | IFNγ       | Fluidigm      | 3168005B                  | B27            | NK cell effector function         |
| 169Tm           | Granzyme K | BioLegend     | 370502                    | GM26E7         | NK cell effector function         |
| 170Er           | CD122      | Fluidigm      | 3170004B                  | Tu27           | NK and T cell effector function   |
| 171Yb           | Granzyme B | Fluidigm      | 3171002B                  | GB11           | NK cell effector function         |
| 172Yb           | CD107a     | Miltenyi      | 130-124-536               | REA792         | NK cell effector function         |
| 173Yb           | CD137      | Fluidigm      | 3173015B                  | 4B4-1          | NK cell effector function         |
| 174Yb           | TOX        | Miltenyi      | custom                    | REA473         | Transcription factor              |
| 175Lu           | Perforin   | Fluidigm      | 3175004B                  | B-D48          | NK cell effector function         |
| 176Yb           | CD4        | Fluidigm      | 3176010B                  | RPA-T4         | T cell                            |
| 198Pt           | HLA-DR     | Miltenyi      | 130-122-299               | REA805         | Lineage marker; myeloid & other   |
| 209Bi           | CD16       | Fluidigm      | 3209002B                  | 3G8            | NK cell                           |

**Supplementary Table 10. Flow cytometry panel for NK cell sorting and killing assay**

| Antigen          | Vendor            | Catalog #   | Clone   | Function                  |
|------------------|-------------------|-------------|---------|---------------------------|
| CD19             | BioLegend         | 302244      | HIB19   | B cell                    |
| CD56             | BioLegend         | 362550      | 5.1H11  | NK cell                   |
| CD3              | BioLegend         | 317346      | OKT3    | T cell                    |
| NKG2A            | Miltenyi          | 130-128-163 | REA110  | NK cell education         |
| NKG2C            | Miltenyi          | 130-117-398 | REA205  | NK cell education         |
| KIR3DL1/L2       | Miltenyi          | 130-116-180 | REA970  | NK cell education         |
| KIR2D            | Miltenyi          | 130-117-483 | REA1042 | NK cell education         |
| CD107a           | Miltenyi          | 130-111-624 | REA792  | NK cell effector function |
| Ksp37            | BioLegend         | 346603      | TDA3    | NK cell effector function |
| Zombie NIR       | BioLegend         | 423106      |         | Fixable viability dye     |
| Propidium iodide | Life Technologies | P3566       |         | Viability dye             |
