# Supplementary material for: Understanding the heterogeneity of alloreactive natural killer cell function in kidney transplantation
Source: PubMed Central journal article supplement (PMC10508724; doi:10.1101/2023.09.01.555962), 2023-09-05
Supplement: media-2.pdf [file media-2.pdf]

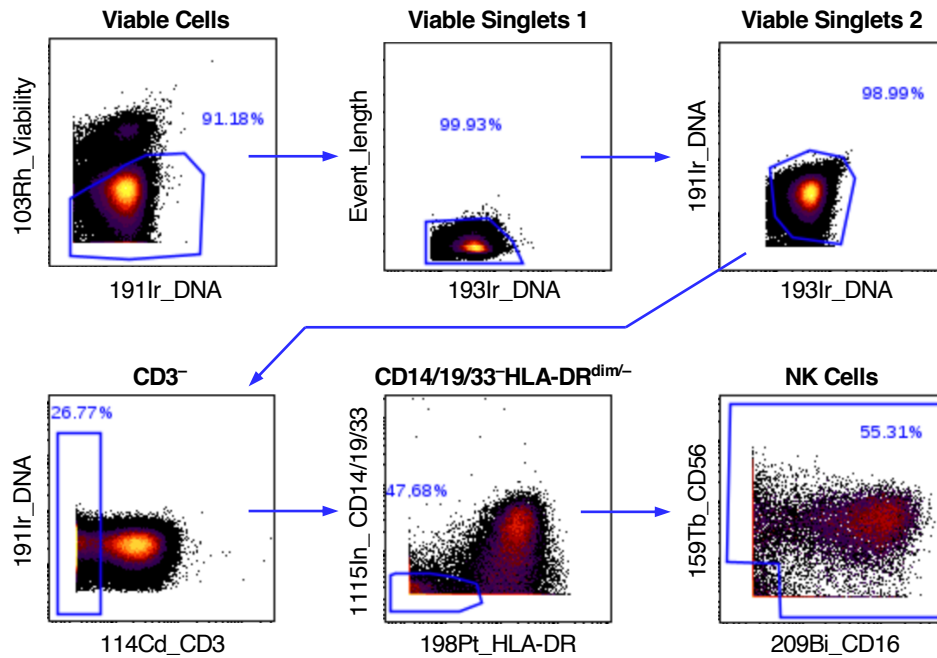

**Supplementary Figure 1. Gating strategy for NK cells on CyTOF sample.** Cryopreserved PBMC were recovered overnight in 10 ng/mL rhIL-15 and profiled by CyTOF following stimulation. Representative FACS plots show manual gating of NK cells prior to unsupervised clustering and downstream analyses.

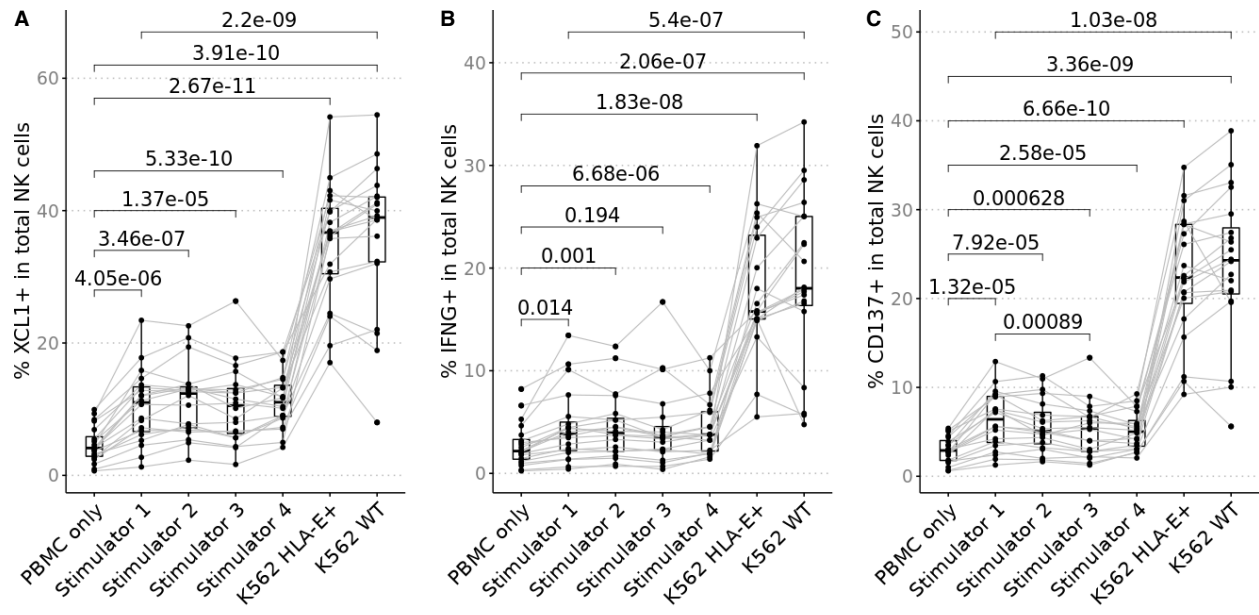

**Supplementary Figure 2. Activation of alloreactive NK cells varies between healthy donors and stimulator cell.**

Cryopreserved PBMC from healthy donor (n=20) were recovered overnight in 10 ng/mL rhIL-15 and stimulated for 6 hours 3:1 E/T with 4 distinct allo-stimulator lines, K562 WT and K562 HLA-E+. Results were profiled by CyTOF. Percentage of (A) XCL1+, (B) IFN $\gamma$ +, (C) CD137+ NK cells across healthy donors increases in response to stimulators. There were no differences between Stimulators 1-4 except for %CD137+ between Stimulator 1 and Stimulator 3. All Stimulators induced less activation than K562 WT and K562 HLA-E+, and there was no difference between K562 WT and K562 HLA-E+. P value was calculated using 2-sided paired Student's t-test and values were adjusted for multiple testing with Bonferroni correction.

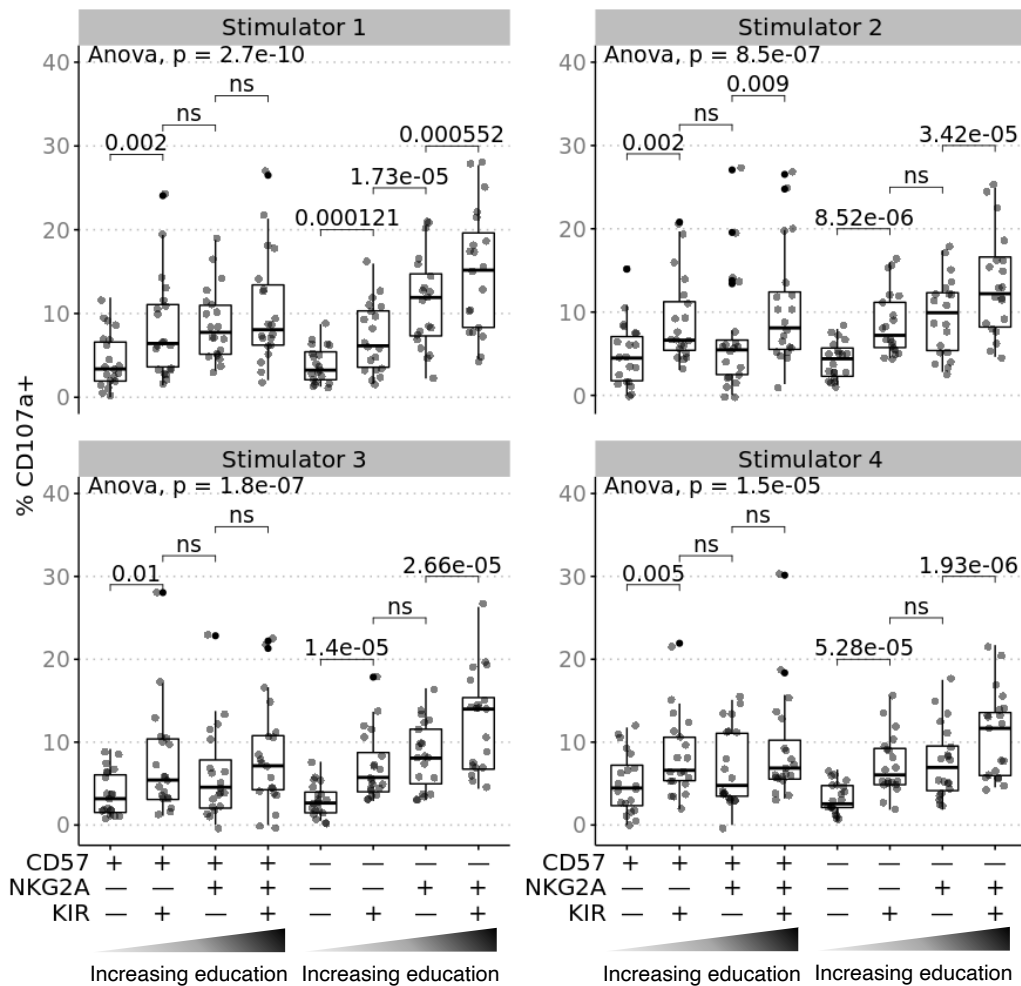

**Supplementary Figure 3. Educated NK cell subsets are more responsive to missing-self when stimulated with all allo-stimulator cell lines.** Cryopreserved PBMC from healthy donor (n=20) were recovered overnight in 10 ng/mL rhIL-15 and stimulated for 6 hours 3:1 E/T with 4 distinct allo-stimulator lines, K562 WT and K562 HLA-E+. Results were profiled by CyTOF. NK cell subsets were defined by gating on combinatorial expression of educating inhibitory receptors, NKG2A, KIR3DL1, KIR3DL2, KIR2DL1/S1, KIR2DL2 and KIR2DL3 and the CD57 maturation marker. NKG2A-expressing and KIR-expressing subsets produce more CD107a in response to B cell allo-stimulators 1-4. *P* value was calculated using 2-sided paired Student's *t*-test and values were adjusted for multiple testing with Bonferroni correction; ns indicates  $p > 0.1$ .

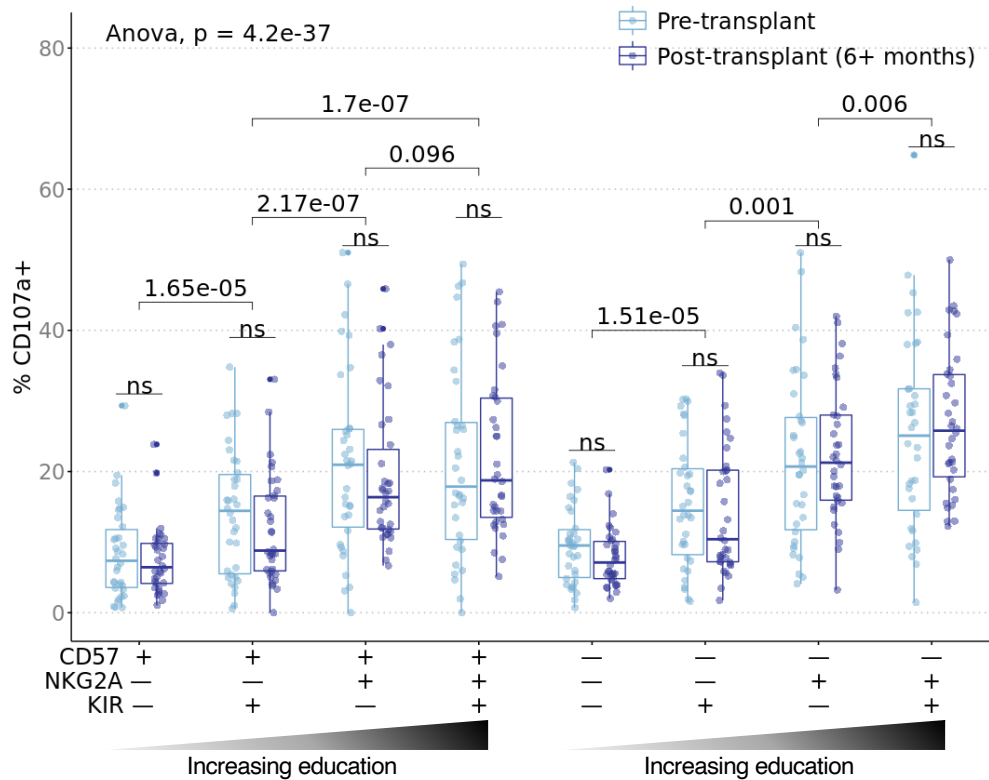

**Supplementary Figure 4. Alloreactivity of educated NK cells transcend donor differences and is maintained post-transplant.**

Cryopreserved pre- and post-transplant PBMC from CTOT01 kidney transplant ( $n=70$ ) were recovered overnight in 10 ng/mL rhIL-15 and stimulated with donor allostimulator B cells for 6 hours at 3:1 E/T. Results were profiled by CyTOF and subsets were defined by gating on CD56<sup>dim</sup> NK cells followed by combinatorial expression of educating inhibitory receptors, NKG2A, KIR3DL1, KIR3DL2, KIR2DL1 and KIR2DL3 and the CD57 maturation marker. Uneducated NK cells, defined as KIR<sup>+</sup> NK cells in recipients without HLA that encode cognate ligand, were removed from the total KIR<sup>+</sup> population of that recipient. The increase in alloreactivity of the educated subsets compared to uneducated subsets in the pre- and post-transplant timepoints are consistent with the results in Figure 5. *P* value was calculated as one-way ANOVA as indicated and as 2-sided paired Student's *t*-test; *t*-test *p* values were adjusted for multiple testing with Bonferroni correction and ns indicates  $p > 0.1$ .

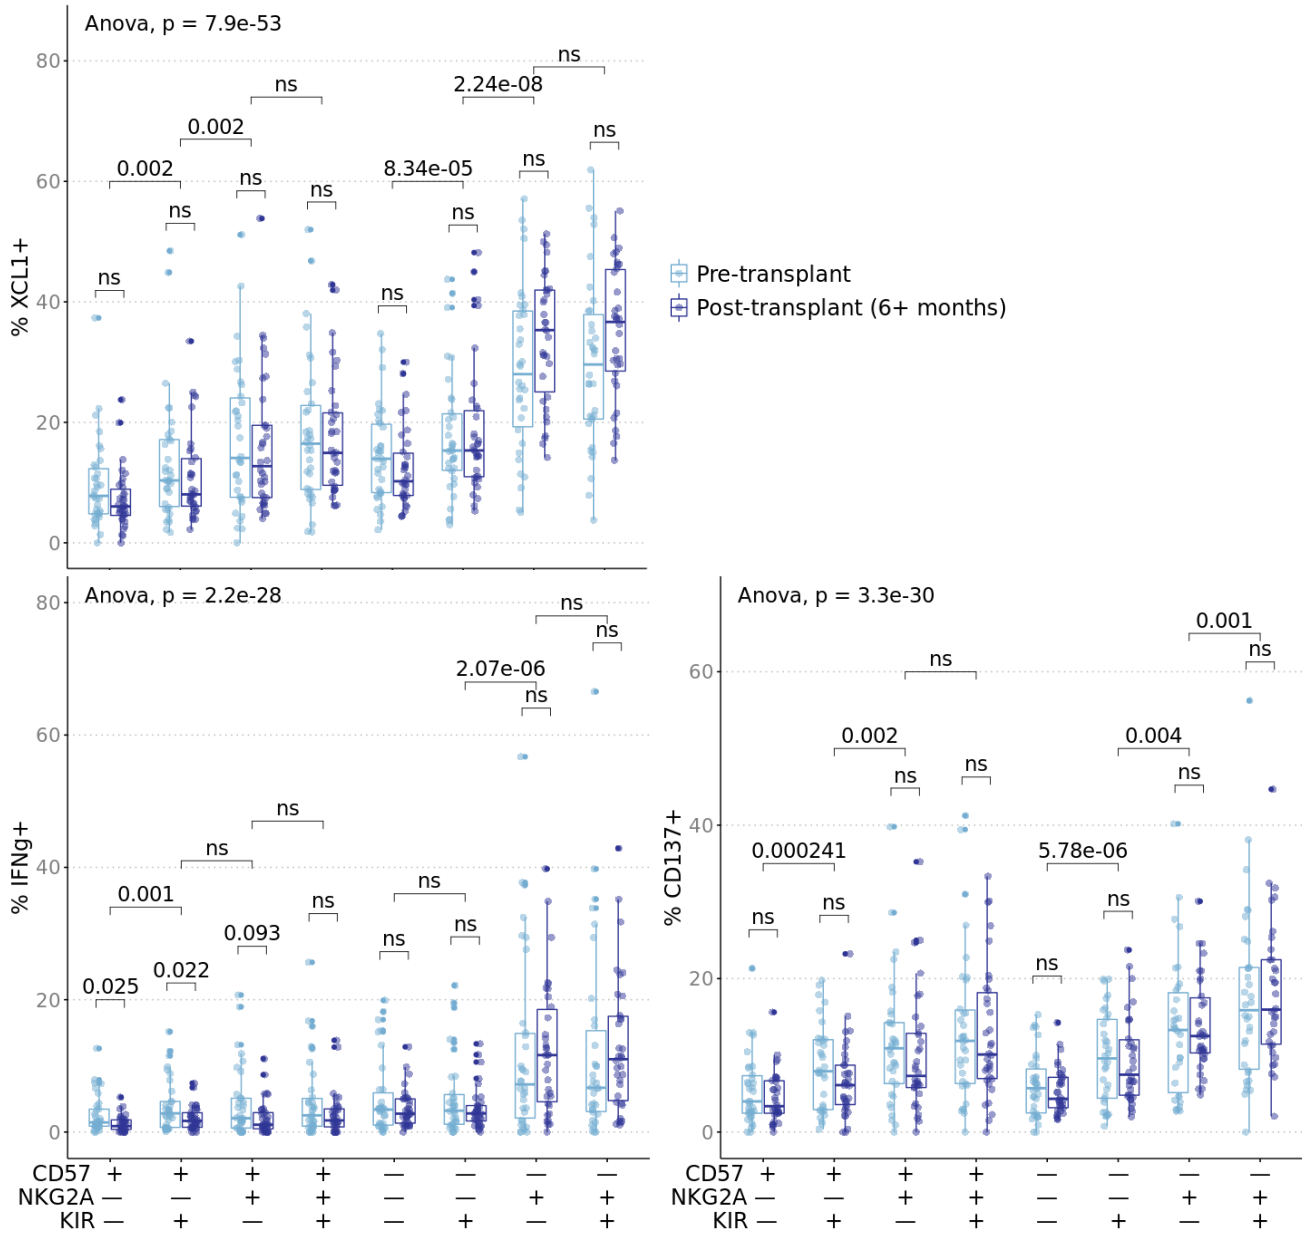

**Supplementary Figure 5. Educated NK cells maintain alloreactivity post-transplant.** Pre- and post-transplant PBMC from CTOT01 kidney transplant (n=70) were recovered overnight in 10 ng/mL rhIL-15 and stimulated with donor allo-stimulator B cells for 6 hours at 3:1 E/T. Results were profiled by CyTOF and subsets were defined by gating on CD56<sup>dim</sup> NK cells followed by combinatorial expression of educating inhibitory receptors, NKG2A, KIR3DL1, KIR3DL2, KIR2DL1 and KIR2DL3 and the CD57 maturation marker. Upon stimulation with donor cells, recipient NKG2A+KIR+ subsets produced the most XCL1, IFN $\gamma$ , and CD137 while the uneducated NKG2A-KIR- subsets produces the least XCL1, IFN $\gamma$ , and CD137. The effect of NKG2A/KIR education on CD137 and CD107a expression in response to donor cells persisted 6+ months post-transplant (n=34). IFN $\gamma$  production in CD57+NKG2A-KIR- and CD57+NKG2A-KIR+ NK cells decreased post-transplant. *P* value was calculated as one-way ANOVA as indicated and as 2-sided paired Student's *t*-test. *t*-test *p* values were adjusted for multiple testing with Bonferroni correction and ns indicates *p* > 0.1.

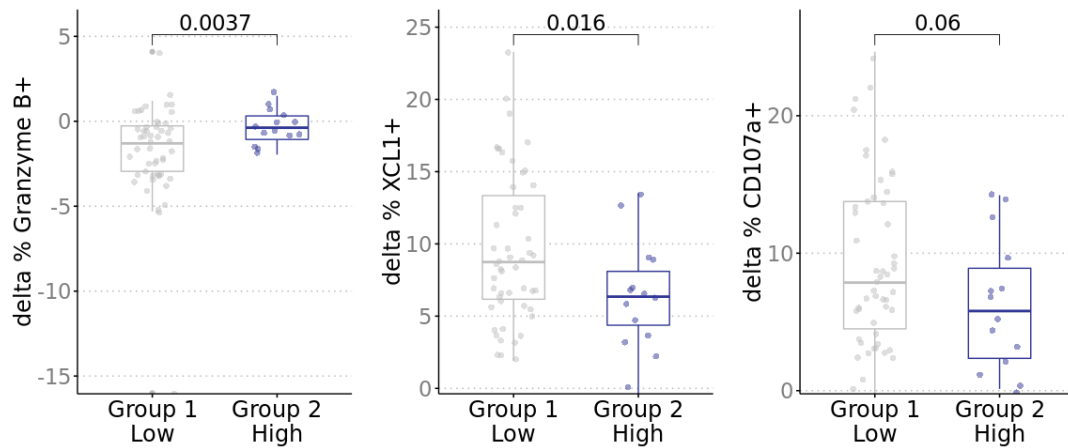

**Supplementary Figure 6. High HLA-E expression on donor cells inhibit recipient NKG2A<sup>+</sup>NKG2C<sup>-</sup> NK cells.** Donor stimulator groups were defined by expression of HLA-E where 75th percentile was high (n=16) and remaining were low (n=51). Hierarchical clustering defined 14 donors with high HLA-E expression and similar expression of other inhibitory/activating NK ligands and 2 donors with high HLA-E expression that also expressed higher CD112/HLA-F expression compared to other high HLA-E donors. One donor expressed CD112 at 3.3 standard deviations greater than the mean and the other donor expressed HLA-F at 1.8 standard deviations from mean. These two donors were excluded from this analysis. Change in percent positive of CD107a, XCL1 and Granzyme B in NKG2A<sup>+</sup>NKG2C<sup>-</sup> cells from baseline was greater when recipient cells were stimulated by donors with lower HLA-E. Nominal *p* value was calculated using 2-sided unpaired Student's *t*-test.

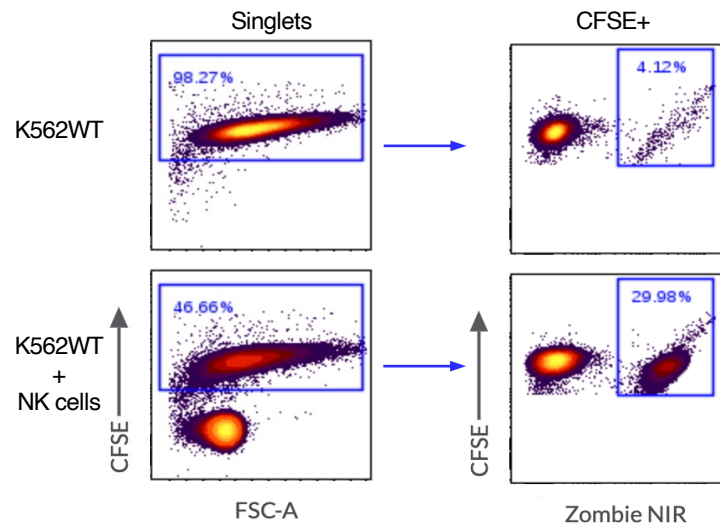

**Supplementary Figure 7. Gating strategy for NK cell killing assays.**

PBMC from healthy donor buffy coats were isolated by Ficoll density centrifugation and rested overnight in 10 ng/mL IL-15. PBMCs were enriched for NK cells by negative selection and flow-sorted for NKG2A<sup>+</sup>KIR<sup>+</sup>NKG2C<sup>-</sup>, NKG2A<sup>+</sup>KIR<sup>-</sup>NKG2C<sup>-</sup>, NKG2A<sup>-</sup>KIR<sup>+</sup>NKG2C<sup>-</sup>, and NKG2A<sup>-</sup>KIR<sup>-</sup>NKG2C<sup>-</sup> subsets. NK cell subsets were stimulated with CFSE-stained K562 wildtype and allo-stimulator B cells. Representative FACS plots show gating on CFSE<sup>+</sup> stimulator cells. Zombie NIR viability dye staining identifies stimulator cells that have died in co-culture with NK cells.
